# Supplementary material
Source: PubMed Central journal article supplement (PMC2075332)
Supplement: jphysiol_2006.126714_1.pdf [file jphysiol_2006.126714_1.pdf]

For each compartment, mean +/- SEM of the relative expression ( $2^{-\Delta C_t}$ ) obtained of each gene versus HPRT (x100)

| Ca <sup>++</sup> channels                                 | LA (n=7) |       | LV (n=7) |       | Lepi (n=7) |       | Lendo (n=7) |       | RA (n=5) |       | RV (n=5) |       | PF (n=8) |      | Repi (n=8) |       | Rendo (n=8) |       |
|-----------------------------------------------------------|----------|-------|----------|-------|------------|-------|-------------|-------|----------|-------|----------|-------|----------|------|------------|-------|-------------|-------|
|                                                           | mean     | SEM   | mean     | SEM   | mean       | SEM   | mean        | SEM   | mean     | SEM   | mean     | SEM   | mean     | SEM  | mean       | SEM   | mean        | SEM   |
| <b>Cav1.2</b>                                             | 578.2    | 112.0 | 626.4    | 71.1  | 812.2      | 77.2  | 538.4       | 61.4  | 646.9    | 77.6  | 748.6    | 115.9 | 454.7    | 60.3 | 692.2      | 61.1  | 454.7       | 41.3  |
| <b>Cav1.3</b>                                             | 19.6     | 7.5   | 1.2      | 0.3   | 1.0        | 0.3   | 1.0         | 0.4   | 7.7      | 1.8   | 0.3      | 0.1   | 1.2      | 0.2  | 1.6        | 0.6   | 0.9         | 0.2   |
| <b>Cav3.1</b>                                             | 206.8    | 49.0  | 2.6      | 0.5   | 2.0        | 0.8   | 3.1         | 1.3   | 20.6     | 3.1   | 1.1      | 0.3   | 4.3      | 1.1  | 4.5        | 0.9   | 3.1         | 0.5   |
| <b>Cav3.2</b>                                             | 10.2     | 0.9   | 7.6      | 0.9   | 9.1        | 1.0   | 9.0         | 1.1   | 7.4      | 0.5   | 11.1     | 1.6   | 8.9      | 1.5  | 9.5        | 0.9   | 10.2        | 1.1   |
| <b>Cav<math>\alpha</math>2<math>\delta</math>1</b>        | 215.9    | 23.5  | 399.5    | 89.6  | 234.7      | 43.3  | 355.9       | 75.1  | 234.4    | 21.2  | 290.5    | 24.2  | 283.2    | 26.3 | 201.8      | 14.0  | 231.8       | 20.2  |
| <b>Cav<math>\alpha</math>2<math>\delta</math>2</b>        | 68.6     | 31.5  | 9.8      | 1.9   | 9.9        | 2.5   | 8.8         | 1.4   | 188.4    | 39.7  | 13.6     | 2.2   | 30.7     | 4.2  | 12.3       | 2.0   | 13.1        | 1.6   |
| <b>Cav<math>\beta</math>2</b>                             | 232.2    | 41.8  | 161.9    | 45.2  | 186.1      | 24.7  | 137.4       | 20.4  | 88.3     | 18.0  | 89.4     | 13.4  | 99.3     | 12.5 | 280.7      | 37.8  | 244.6       | 39.7  |
| <b>Connexins</b>                                          |          |       |          |       |            |       |             |       |          |       |          |       |          |      |            |       |             |       |
| <b>Cx43</b>                                               | 1105.1   | 167.3 | 1317.9   | 182.7 | 1195.2     | 177.9 | 1387.8      | 172.7 | 437.7    | 60.3  | 897.5    | 124.7 | 429.6    | 53.4 | 1588.3     | 258.7 | 1745.1      | 250.0 |
| <b>Cx40</b>                                               | 589.8    | 191.3 | 158.2    | 45.7  | 83.6       | 11.4  | 146.4       | 18.0  | 607.6    | 186.4 | 176.5    | 38.2  | 388.6    | 71.4 | 46.3       | 7.8   | 95.3        | 20.7  |
| <b>Cx45</b>                                               | 214.9    | 36.8  | 226.3    | 41.0  | 163.3      | 27.3  | 148.8       | 32.3  | 239.5    | 21.6  | 225.7    | 25.8  | 124.9    | 8.8  | 107.7      | 12.3  | 98.3        | 13.6  |
| <b>Na<sup>+</sup> channels</b>                            |          |       |          |       |            |       |             |       |          |       |          |       |          |      |            |       |             |       |
| <b>Nav<math>\beta</math>1</b>                             | 429.7    | 54.2  | 133.6    | 28.5  | 152.2      | 29.2  | 224.3       | 44.2  | 622.2    | 108.0 | 315.9    | 63.0  | 396.6    | 56.1 | 163.0      | 15.0  | 200.0       | 24.0  |
| <b>Nav<math>\beta</math>2</b>                             | 27.3     | 5.0   | 36.7     | 9.8   | 29.8       | 6.3   | 27.7        | 5.2   | 54.2     | 6.9   | 91.1     | 20.0  | 70.0     | 18.6 | 33.1       | 4.6   | 33.9        | 6.5   |
| <b>Nav<math>\beta</math>3</b>                             | 8.5      | 0.9   | 10.6     | 1.6   | 9.3        | 1.4   | 11.4        | 2.3   | 6.2      | 0.9   | 13.3     | 1.3   | 12.3     | 2.2  | 4.9        | 0.5   | 5.1         | 0.9   |
| <b>Nav1.1</b>                                             | 1.9      | 0.5   | 1.3      | 0.3   | 1.5        | 0.8   | 1.5         | 0.5   | 1.5      | 0.5   | 2.7      | 0.7   | 1.5      | 0.5  | 2.4        | 0.6   | 3.0         | 0.8   |
| <b>Nav1.3</b>                                             | 7.1      | 2.3   | 7.8      | 2.4   | 7.6        | 2.6   | 5.4         | 1.7   | 3.0      | 0.7   | 7.1      | 1.8   | 6.7      | 1.2  | 8.5        | 2.1   | 9.1         | 1.6   |
| <b>Nav1.5</b>                                             | 814.2    | 70.1  | 529.9    | 58.7  | 442.4      | 77.8  | 562.4       | 71.0  | 588.1    | 52.5  | 730.7    | 98.7  | 500.6    | 51.2 | 351.5      | 49.7  | 672.4       | 68.0  |
| <b>Nav1.7</b>                                             | 14.6     | 1.8   | 7.2      | 1.2   | 9.6        | 1.3   | 13.0        | 1.1   | 0.4      | 0.1   | 1.4      | 0.1   | 6.9      | 0.7  | 11.0       | 1.2   | 11.2        | 1.5   |
| <b>Nav2.1</b>                                             | 375.9    | 39.6  | 402.2    | 134.8 | 305.5      | 48.1  | 360.2       | 50.4  | 200.7    | 31.7  | 285.8    | 38.3  | 236.9    | 45.5 | 506.9      | 49.0  | 549.6       | 57.3  |
| <b>K<sup>+</sup> channel <math>\alpha</math>-subunits</b> |          |       |          |       |            |       |             |       |          |       |          |       |          |      |            |       |             |       |
| <b>Kv1.2</b>                                              | 7.2      | 2.1   | 3.7      | 1.1   | 3.3        | 0.9   | 2.8         | 1.0   | 2.7      | 0.4   | 4.1      | 1.3   | 4.1      | 1.0  | 5.4        | 1.3   | 3.1         | 0.5   |
| <b>Kv1.3</b>                                              | 16.8     | 3.3   | 4.2      | 1.1   | 4.5        | 0.5   | 2.6         | 0.4   | 4.1      | 1.0   | 1.6      | 0.3   | 3.6      | 0.4  | 3.9        | 0.4   | 2.4         | 0.3   |
| <b>Kv1.4</b>                                              | 4.8      | 1.0   | 21.0     | 2.5   | 13.4       | 3.5   | 27.3        | 4.3   | 7.0      | 1.8   | 34.0     | 6.5   | 35.0     | 3.8  | 7.3        | 1.5   | 18.6        | 2.9   |
| <b>Kv1.5</b>                                              | 689.6    | 163.3 | 32.0     | 18.5  | 16.7       | 3.8   | 30.3        | 7.3   | 652.2    | 112.2 | 26.1     | 5.3   | 37.2     | 10.4 | 20.3       | 4.5   | 25.3        | 2.6   |
| <b>Kv1.6</b>                                              | 20.8     | 3.1   | 7.9      | 2.9   | 6.3        | 1.3   | 6.0         | 1.5   | 9.4      | 0.7   | 3.5      | 0.8   | 8.1      | 1.0  | 7.0        | 0.7   | 4.4         | 0.8   |
| <b>Kv1.7</b>                                              | 33.9     | 10.6  | 6.9      | 2.4   | 11.4       | 3.3   | 6.8         | 2.3   | 19.3     | 4.9   | 13.9     | 5.7   | 15.0     | 1.1  | 9.0        | 2.7   | 6.7         | 1.9   |
| <b>Kv2.1</b>                                              | 10.8     | 6.5   | 14.0     | 3.7   | 21.1       | 11.6  | 17.4        | 8.1   | 5.8      | 3.1   | 8.9      | 8.3   | 12.8     | 1.4  | 18.2       | 10.2  | 11.7        | 5.4   |
| <b>Kv3.3</b>                                              | 4.8      | 1.1   | 3.4      | 0.6   | 2.9        | 0.5   | 3.0         | 0.5   | 2.9      | 0.4   | 1.7      | 0.5   | 0.8      | 0.2  | 2.5        | 0.3   | 2.9         | 0.4   |
| <b>Kv3.4</b>                                              | 24.1     | 1.3   | 22.3     | 4.5   | 27.1       | 2.6   | 24.1        | 3.7   | 42.7     | 2.3   | 30.0     | 4.8   | 26.5     | 2.4  | 22.4       | 1.7   | 22.7        | 2.3   |
| <b>Kv4.1</b>                                              | 5.4      | 1.0   | 2.7      | 0.8   | 2.2        | 0.4   | 2.9         | 0.4   | 7.0      | 0.9   | 4.0      | 1.1   | 9.5      | 1.7  | 3.1        | 0.5   | 2.4         | 0.5   |
| <b>Kv4.2</b>                                              | 13.6     | 3.9   | 5.2      | 1.9   | 6.5        | 0.5   | 5.0         | 1.8   | 2.0      | 0.7   | 1.5      | 0.7   | 3.7      | 1.0  | 9.5        | 2.0   | 3.8         | 0.6   |
| <b>Kv4.3</b>                                              | 98.5     | 10.6  | 60.3     | 6.9   | 61.1       | 9.2   | 71.1        | 6.9   | 148.1    | 20.3  | 91.0     | 14.8  | 181.0    | 20.4 | 39.9       | 5.4   | 40.6        | 5.0   |
| <b>Herg</b>                                               | 303.5    | 24.3  | 232.8    | 38.5  | 246.1      | 41.9  | 232.1       | 38.5  | 379.0    | 40.3  | 400.3    | 36.4  | 403.3    | 55.6 | 156.6      | 14.8  | 189.9       | 16.0  |
| <b>KvLQT1</b>                                             | 166.4    | 23.7  | 113.1    | 14.3  | 178.3      | 19.7  | 135.1       | 12.2  | 80.0     | 9.8   | 116.2    | 9.1   | 101.7    | 5.4  | 225.4      | 20.5  | 206.1       | 26.5  |

| K <sup>+</sup> channel $\beta$ -subunits | LA (n=7) |      | LV (n=7) |       | Lepi (n=7) |       | Lendo (n=7) |      | RA (n=5) |      | RV (n=5) |       | PF (n=8) |      | Repi (n=8) |      | Rendo (n=8) |      |
|------------------------------------------|----------|------|----------|-------|------------|-------|-------------|------|----------|------|----------|-------|----------|------|------------|------|-------------|------|
|                                          | mean     | SEM  | mean     | SEM   | mean       | SEM   | mean        | SEM  | mean     | SEM  | mean     | SEM   | mean     | SEM  | mean       | SEM  | mean        | SEM  |
| SUR1                                     | 6.5      | 0.7  | 4.9      | 0.7   | 7.5        | 1.5   | 5.8         | 1.7  | 2.1      | 0.3  | 1.7      | 0.4   | 1.4      | 0.3  | 6.5        | 1.1  | 4.6         | 0.8  |
| SUR2                                     | 498.6    | 42.7 | 631.4    | 109.7 | 690.5      | 88.9  | 636.0       | 81.7 | 55.3     | 5.9  | 99.6     | 20.2  | 134.0    | 11.1 | 877.5      | 64.9 | 754.5       | 47.3 |
| Kv $\beta$ 1                             | 17.0     | 3.6  | 17.0     | 5.5   | 13.7       | 3.3   | 13.3        | 3.2  | 14.9     | 3.3  | 25.3     | 3.3   | 12.7     | 1.8  | 17.7       | 3.5  | 14.8        | 2.0  |
| Kv $\beta$ 2                             | 120.8    | 24.4 | 236.9    | 71.7  | 150.5      | 21.9  | 162.7       | 21.9 | 22.8     | 3.6  | 46.7     | 4.6   | 82.9     | 10.0 | 136.7      | 13.8 | 174.2       | 13.2 |
| Kv $\beta$ 3                             | 2.2      | 0.5  | 1.9      | 0.7   | 1.7        | 0.4   | 1.8         | 0.3  | 0.2      | 0.0  | 0.2      | 0.0   | 2.4      | 0.3  | 1.5        | 0.4  | 1.0         | 0.2  |
| MinK                                     | 20.4     | 3.7  | 18.0     | 4.2   | 12.5       | 2.6   | 12.6        | 2.5  | 28.2     | 4.1  | 21.5     | 1.7   | 12.0     | 0.4  | 16.3       | 1.7  | 14.1        | 1.4  |
| MIRP1                                    | 2.4      | 0.4  | 1.1      | 0.3   | 1.4        | 0.4   | 1.9         | 0.5  | 2.3      | 0.5  | 1.4      | 0.4   | 3.0      | 0.6  | 2.2        | 0.8  | 1.9         | 0.2  |
| MIRP2                                    | 17.2     | 1.8  | 15.4     | 4.5   | 9.7        | 1.2   | 12.3        | 1.4  | 23.8     | 2.1  | 23.9     | 1.7   | 35.0     | 7.1  | 11.1       | 2.0  | 11.9        | 3.0  |
| MIRP3                                    | 30.9     | 12.4 | 12.1     | 2.6   | 11.5       | 2.8   | 12.8        | 2.5  | 57.5     | 12.6 | 25.6     | 4.5   | 34.5     | 4.6  | 12.3       | 1.8  | 12.6        | 2.2  |
| MIRP4                                    | 2.1      | 0.6  | 1.1      | 0.3   | 1.0        | 0.2   | 1.3         | 0.3  | 3.3      | 0.5  | 2.4      | 0.4   | 0.8      | 0.2  | 2.1        | 0.5  | 1.6         | 0.2  |
| KChIP2                                   | 639.1    | 60.4 | 268.7    | 87.0  | 467.6      | 111.2 | 14.6        | 4.6  | 611.3    | 82.8 | 703.7    | 195.4 | 13.5     | 4.0  | 448.3      | 68.3 | 151.0       | 25.9 |
| KChAP                                    | 55.6     | 5.3  | 50.2     | 5.5   | 46.7       | 3.8   | 47.7        | 4.8  | 44.3     | 3.7  | 40.1     | 1.4   | 66.8     | 6.5  | 50.0       | 3.2  | 46.6        | 3.2  |

#### Kir channels

|        |       |      |       |      |       |      |       |      |       |       |       |      |       |      |       |      |       |      |
|--------|-------|------|-------|------|-------|------|-------|------|-------|-------|-------|------|-------|------|-------|------|-------|------|
| Kir2.1 | 45.3  | 9.9  | 144.9 | 30.6 | 132.8 | 20.4 | 131.7 | 19.3 | 49.8  | 7.3   | 200.6 | 25.8 | 72.6  | 10.2 | 125.9 | 18.6 | 165.5 | 22.9 |
| Kir2.2 | 304.1 | 37.0 | 177.7 | 29.7 | 187.9 | 38.6 | 163.2 | 43.2 | 116.5 | 25.3  | 125.0 | 21.6 | 46.8  | 6.6  | 83.0  | 5.4  | 61.4  | 7.8  |
| Kir2.3 | 88.0  | 11.2 | 163.6 | 29.8 | 109.9 | 25.9 | 132.7 | 21.8 | 213.1 | 41.2  | 106.1 | 25.8 | 61.6  | 10.8 | 51.7  | 12.2 | 75.8  | 7.0  |
| Kir3.1 | 303.2 | 31.1 | 7.1   | 3.0  | 3.9   | 2.2  | 16.8  | 6.5  | 158.4 | 23.8  | 3.9   | 1.3  | 48.4  | 9.2  | 3.6   | 1.0  | 14.8  | 4.3  |
| Kir3.4 | 63.1  | 6.1  | 38.4  | 22.8 | 70.1  | 27.3 | 58.9  | 34.3 | 39.2  | 6.8   | 20.4  | 33.4 | 24.6  | 5.9  | 41.2  | 13.5 | 46.1  | 27.5 |
| Kir6.1 | 167.5 | 19.0 | 298.5 | 42.9 | 527.0 | 66.2 | 384.6 | 31.3 | 49.7  | 7.6   | 158.3 | 15.7 | 63.6  | 9.8  | 633.3 | 96.3 | 557.6 | 54.3 |
| Kir6.2 | 85.5  | 10.1 | 65.9  | 12.6 | 72.0  | 13.5 | 57.6  | 9.4  | 125.1 | 18.8  | 172.1 | 40.2 | 55.9  | 4.5  | 72.0  | 13.7 | 68.6  | 12.9 |
| TWIK1  | 688.5 | 75.8 | 122.1 | 19.6 | 133.1 | 24.8 | 148.6 | 38.3 | 745.2 | 114.7 | 216.2 | 30.9 | 350.3 | 42.8 | 127.4 | 15.8 | 116.7 | 17.6 |
| TASK1  | 109.8 | 14.5 | 9.3   | 2.4  | 8.9   | 2.0  | 12.7  | 3.2  | 129.4 | 33.6  | 8.9   | 2.3  | 14.1  | 2.1  | 6.7   | 2.2  | 7.1   | 2.4  |
| TASK2  | 5.9   | 0.6  | 2.8   | 0.6  | 2.2   | 0.4  | 3.8   | 0.8  | 7.0   | 1.6   | 5.3   | 0.6  | 9.8   | 1.8  | 3.4   | 0.9  | 3.1   | 0.6  |

#### HCN channels

|      |       |      |      |      |      |      |      |      |       |      |      |      |      |      |      |      |      |      |
|------|-------|------|------|------|------|------|------|------|-------|------|------|------|------|------|------|------|------|------|
| HCN1 | 270.2 | 51.0 | 5.4  | 2.5  | 2.9  | 0.7  | 6.2  | 2.8  | 70.3  | 9.6  | 0.4  | 0.1  | 8.2  | 3.1  | 0.8  | 0.3  | 0.6  | 0.2  |
| HCN2 | 61.2  | 13.9 | 90.7 | 24.3 | 44.0 | 9.5  | 61.1 | 14.6 | 158.7 | 41.2 | 24.7 | 6.0  | 11.4 | 2.3  | 12.5 | 4.5  | 22.6 | 4.0  |
| HCN3 | 3.8   | 0.4  | 3.2  | 0.6  | 3.8  | 0.7  | 3.1  | 0.6  | 4.2   | 0.7  | 5.7  | 1.6  | 8.9  | 1.2  | 3.7  | 0.5  | 3.5  | 0.5  |
| HCN4 | 158.5 | 26.2 | 85.5 | 12.9 | 78.7 | 19.9 | 87.0 | 10.7 | 214.4 | 31.9 | 75.9 | 17.9 | 98.2 | 11.1 | 71.2 | 10.8 | 85.3 | 12.3 |

#### Cl<sup>-</sup> channels

|      |       |      |       |      |       |      |       |      |       |      |       |      |       |      |       |      |       |      |
|------|-------|------|-------|------|-------|------|-------|------|-------|------|-------|------|-------|------|-------|------|-------|------|
| CIC2 | 7.8   | 1.4  | 7.4   | 0.8  | 15.2  | 3.7  | 8.8   | 1.4  | 10.7  | 1.2  | 13.2  | 1.1  | 18.6  | 2.8  | 9.6   | 1.1  | 9.7   | 1.3  |
| CIC3 | 352.3 | 53.8 | 265.1 | 22.6 | 319.8 | 59.6 | 264.6 | 28.5 | 130.0 | 10.7 | 152.9 | 21.4 | 95.3  | 4.0  | 592.8 | 53.7 | 483.7 | 42.1 |
| CIC6 | 242.4 | 10.1 | 192.9 | 14.7 | 220.3 | 14.3 | 194.7 | 12.0 | 132.2 | 11.2 | 146.2 | 12.4 | 175.2 | 18.4 | 204.2 | 15.3 | 177.6 | 12.6 |
| CIC7 | 112.8 | 12.2 | 111.5 | 15.5 | 159.6 | 13.9 | 155.0 | 9.3  | 159.9 | 19.2 | 183.0 | 33.9 | 164.4 | 19.9 | 122.7 | 14.6 | 128.6 | 21.2 |

| Ca <sup>2+</sup> handling               | LA (n=7) |       | LV (n=7) |        | Lepi (n=7) |        | Lendo (n=7) |       | RA (n=5) |       | RV (n=5) |       | PF (n=8) |       | Repi (n=8) |       | Rendo (n=8) |       |
|-----------------------------------------|----------|-------|----------|--------|------------|--------|-------------|-------|----------|-------|----------|-------|----------|-------|------------|-------|-------------|-------|
|                                         | mean     | SEM   | mean     | SEM    | mean       | SEM    | mean        | SEM   | mean     | SEM   | mean     | SEM   | mean     | SEM   | mean       | SEM   | mean        | SEM   |
| <b>Na/K ATPase <math>\alpha</math>1</b> | 658.7    | 70.9  | 739.8    | 125.2  | 641.8      | 99.4   | 793.1       | 157.5 | 1009.9   | 231.9 | 1272.1   | 201.0 | 1502.0   | 264.9 | 443.7      | 41.5  | 500.0       | 90.3  |
| <b>Na/K ATPase <math>\alpha</math>3</b> | 2261.6   | 147.7 | 1749.2   | 339.3  | 1807.6     | 331.8  | 1613.8      | 321.0 | 4100.0   | 167.4 | 5446.4   | 526.2 | 1345.1   | 194.9 | 2621.8     | 338.4 | 2713.6      | 347.1 |
| <b>Na/K ATPase <math>\beta</math>1</b>  | 1546.4   | 110.2 | 1944.0   | 269.6  | 1743.9     | 131.6  | 2025.7      | 191.0 | 1518.6   | 97.1  | 2218.9   | 187.5 | 1630.9   | 137.6 | 2189.0     | 116.4 | 2627.9      | 214.6 |
| <b>SERCA2</b>                           | 13393.9  | 613.2 | 7863.9   | 1575.3 | 9637.8     | 1323.4 | 5785.7      | 688.3 | 7800.6   | 746.2 | 8695.5   | 839.7 | 2687.4   | 193.8 | 11434.6    | 620.8 | 9108.3      | 603.8 |
| <b>SERCA3</b>                           | 41.1     | 3.8   | 38.0     | 6.7    | 28.9       | 4.1    | 34.6        | 3.7   | 79.2     | 6.5   | 61.4     | 4.4   | 81.4     | 13.7  | 24.5       | 2.0   | 24.8        | 1.9   |
| <b>PMCA1</b>                            | 86.4     | 5.5   | 89.8     | 15.3   | 86.2       | 12.2   | 82.4        | 7.0   | 48.7     | 6.2   | 54.7     | 4.3   | 55.8     | 5.7   | 71.5       | 6.0   | 65.6        | 4.5   |
| <b>PMCA4</b>                            | 716.2    | 55.6  | 1235.0   | 276.3  | 1047.1     | 162.4  | 1129.1      | 174.8 | 719.5    | 76.2  | 873.7    | 127.5 | 933.7    | 146.4 | 832.2      | 102.2 | 768.3       | 106.2 |
| <b>NCX1</b>                             | 1050.7   | 54.0  | 1050.0   | 226.2  | 1309.0     | 100.6  | 1031.7      | 163.8 | 1400.6   | 54.7  | 2207.9   | 277.9 | 1188.9   | 139.2 | 1123.3     | 76.9  | 1066.8      | 57.7  |

**pumps / exchangers**

|                |         |        |         |        |         |        |         |        |         |        |         |        |        |        |         |        |         |        |
|----------------|---------|--------|---------|--------|---------|--------|---------|--------|---------|--------|---------|--------|--------|--------|---------|--------|---------|--------|
| <b>CALM1</b>   | 1477.5  | 132.5  | 1258.6  | 106.3  | 1355.3  | 113.0  | 1360.0  | 210.4  | 122.5   | 11.4   | 182.1   | 7.5    | 477.7  | 37.7   | 1260.3  | 93.7   | 1253.2  | 151.8  |
| <b>CALM3</b>   | 2489.1  | 232.9  | 2363.2  | 143.6  | 2841.1  | 265.3  | 2351.6  | 212.5  | 1017.4  | 56.2   | 1348.6  | 118.8  | 1299.1 | 78.5   | 3559.4  | 186.3  | 3144.9  | 193.1  |
| <b>CASQ1</b>   | 116.5   | 34.4   | 378.2   | 83.2   | 215.3   | 57.0   | 232.8   | 41.5   | 96.8    | 26.3   | 129.5   | 29.1   | 157.0  | 35.4   | 211.6   | 71.3   | 169.7   | 31.7   |
| <b>CASQ2</b>   | 3009.3  | 152.8  | 2921.1  | 292.6  | 2822.0  | 294.5  | 3198.0  | 313.9  | 3524.2  | 286.4  | 4147.2  | 415.6  | 1916.0 | 235.7  | 3047.3  | 346.9  | 3518.4  | 256.5  |
| <b>InsP3R1</b> | 142.7   | 16.0   | 126.3   | 20.9   | 90.5    | 14.1   | 137.8   | 19.1   | 116.5   | 12.0   | 152.9   | 15.8   | 246.1  | 26.0   | 78.2    | 10.0   | 85.9    | 9.4    |
| <b>InsP3R3</b> | 53.0    | 9.0    | 65.6    | 13.6   | 72.6    | 6.7    | 67.1    | 11.9   | 69.5    | 7.9    | 105.8   | 18.5   | 131.2  | 15.7   | 57.0    | 8.9    | 45.9    | 7.3    |
| <b>PLB</b>     | 11752.3 | 1864.0 | 16652.8 | 3082.9 | 14668.8 | 2476.3 | 14031.5 | 1744.6 | 4703.3  | 871.1  | 9519.4  | 1008.3 | 7622.1 | 1342.8 | 25046.8 | 4077.6 | 22730.4 | 3008.3 |
| <b>CAM-PRP</b> | 129.2   | 19.3   | 118.2   | 14.0   | 144.4   | 21.1   | 115.6   | 17.0   | 63.1    | 6.3    | 86.9    | 9.7    | 71.9   | 9.2    | 210.7   | 26.1   | 148.2   | 11.0   |
| <b>RYR2</b>    | 6819.7  | 325.6  | 9245.7  | 330.8  | 10305.3 | 830.3  | 8998.2  | 665.7  | 12940.0 | 1352.1 | 25054.3 | 2570.5 | 8612.3 | 396.6  | 11324.2 | 1125.7 | 9216.4  | 864.9  |
