# Supplementary material
Source: PubMed Central journal article supplement (PMC2075332)
Supplement: jphysiol_2006.126714_2.pdf [file jphysiol_2006.126714_2.pdf]

| Gene Symbol     | Gene Name                 |                                                                           | NCBI Gene Ref    | Chromosome | Assay ID      | Target Exons | Category                               |
|-----------------|---------------------------|---------------------------------------------------------------------------|------------------|------------|---------------|--------------|----------------------------------------|
| <b>18S RNA</b>  | 18S RNA                   | Eukaryotic 18s rRNA                                                       | X03205           | 9          | 4342379-18S   | N/A          | endogenous control                     |
| <b>ABCC8</b>    | SUR1                      | ATP-binding cassette, sub-family C (CFTR/MRP), member 8                   | NM_000352,U63421 | 11         | Hs00165861_m1 | 16           | K <sup>+</sup> channel                 |
| <b>ABCC9</b>    | SUR2                      | ATP-binding cassette, sub-family C (CFTR/MRP), member 9                   | NM_005691,NM_02  | 12         | Hs00245832_m1 | 28           | K <sup>+</sup> channel                 |
| <b>ATP1A1</b>   | Na/K-ATPase $\alpha$ 1    | ATPase, Na <sup>+</sup> /K <sup>+</sup> transporting, alpha 1 polypeptide | NM_001001586,NM  | 1          | Hs00167556_m1 | 15           | Na <sup>+</sup> /K <sup>+</sup> ATPase |
| <b>ATP1A3</b>   | Na/K-ATPase $\alpha$ 3    | ATPase, Na <sup>+</sup> /K <sup>+</sup> transporting, alpha 3 polypeptide | NM_152296,BC0092 | 19         | Hs00265163_m1 | N/A          | Na <sup>+</sup> /K <sup>+</sup> ATPase |
| <b>ATP1B1</b>   | Na/K-ATPase $\beta$ 1     | ATPase, Na <sup>+</sup> /K <sup>+</sup> transporting, beta 1 polypeptide  | NM_001001787,NM  | 1          | Hs00426868_g1 | 5            | Na <sup>+</sup> /K <sup>+</sup> ATPase |
| <b>ATP2A2</b>   | SERCA2                    | ATPase, Ca <sup>++</sup> transporting, cardiac muscle, slow twitch 2      | NM_001681,M23115 | 12         | Hs00155939_m1 | 20           | Ca <sup>++</sup> regulator             |
| <b>ATP2A3</b>   | SERCA3                    | ATPase, Ca <sup>++</sup> transporting, ubiquitous                         | NM_174953,NM_17  | 17         | Hs00193090_m1 | 17           | Ca <sup>++</sup> regulator             |
| <b>ATP2B1</b>   | PMCA1                     | ATPase, Ca <sup>++</sup> transporting, plasma membrane 1                  | NM_001001323,NM  | 12         | Hs00155949_m1 | 11           | Ca <sup>++</sup> regulator             |
| <b>ATP2B4</b>   | PMCA4                     | ATPase, Ca <sup>++</sup> transporting, plasma membrane 4                  | NM_001001396,NM  | 1          | Hs00608066_m1 | 1            | Ca <sup>++</sup> regulator             |
| <b>CACNA1C</b>  | Cav1.2                    | calcium channel, voltage-dependent, L type, alpha 1C subunit              | NM_000719,L29529 | 12         | Hs00167681_m1 | 2            | Ca <sup>++</sup> channel               |
| <b>CACNA1D</b>  | Cav1.3                    | calcium channel, voltage-dependent, L type, alpha 1D subunit              | NM_000720,M83566 | 3          | Hs00167753_m1 | 47           | Ca <sup>++</sup> channel               |
| <b>CACNA1G</b>  | Cav3.1                    | calcium channel, voltage-dependent, alpha 1G subunit                      | NM_018896,NM_19  | 17         | Hs00367969_m1 | 4            | Ca <sup>++</sup> channel               |
| <b>CACNA1H</b>  | Cav3.2                    | calcium channel, voltage-dependent, alpha 1H subunit                      | NM_021098,AF0519 | 16         | Hs00234934_m1 | 1            | Ca <sup>++</sup> channel               |
| <b>CACNA2D1</b> | Cav $\alpha$ 2 $\delta$ 1 | calcium channel, voltage-dependent, alpha 2/delta subunit 1               | NM_000722,M76559 | 7          | Hs00167808_m1 | 13           | Ca <sup>++</sup> channel               |
| <b>CACNA2D2</b> | Cav $\alpha$ 2 $\delta$ 2 | calcium channel, voltage-dependent, alpha 2/delta subunit 2               | NM_006030,AB0111 | 3          | Hs00195772_m1 | 6            | Ca <sup>++</sup> channel               |
| <b>CACNB2</b>   | Cav $\beta$ 2             | calcium channel, voltage-dependent, beta 2 subunit                        | NM_201593,NM_20  | 10         | Hs00167861_m1 | 9            | Ca <sup>++</sup> channel               |
| <b>CACNG4</b>   | Cav $\gamma$ 4            | calcium channel, voltage-dependent, gamma subunit 4                       | NM_014405,AF1626 | 17         | Hs00205244_m1 | 2            | Ca <sup>++</sup> channel               |
| <b>CACNG5</b>   | Cav $\gamma$ 5            | calcium channel, voltage-dependent, gamma subunit 5                       | NM_145811,NM_14  | 17         | Hs00274241_m1 | 1            | Ca <sup>++</sup> channel               |
| <b>CACNG6</b>   | Cav $\gamma$ 6            | calcium channel, voltage-dependent, gamma subunit 6                       | NM_145814,NM_14  | 19         | Hs00230428_m1 | N/A          | Ca <sup>++</sup> channel               |
| <b>CALM1</b>    | CALM1                     | calmodulin 1 (phosphorylase kinase, delta)                                | NM_006888,BX5376 | 14         | Hs00300085_s1 | 6            | Ca <sup>++</sup> regulator             |
| <b>CALM3</b>    | CALM3                     | calmodulin 3 (phosphorylase kinase, delta)                                | NM_005184,J04046 | 19         | Hs00270914_m1 | 1            | Ca <sup>++</sup> regulator             |
| <b>CASQ1</b>    | CASQ1                     | calsequestrin 1 (fast-twitch, skeletal muscle)                            | NM_001231,S73775 | 1          | Hs00154281_m1 | 6            | Ca <sup>++</sup> regulator             |
| <b>CASQ2</b>    | CASQ2                     | calsequestrin 2 (cardiac muscle)                                          | NM_001232,D55655 | 1          | Hs00415779_m1 | N/A          | Ca <sup>++</sup> regulator             |
| <b>CFTR</b>     | CFTR                      | cystic fibrosis transmembrane conductance regulator, ATP-binding cassette | NM_000492,M28666 | 7          | Hs00357011_m1 | 21           | Cl <sup>-</sup> channel                |
| <b>CLCN2</b>    | CIC2                      | chloride channel 2                                                        | NM_004366,AF0260 | 3          | Hs00189078_m1 | 1            | Cl <sup>-</sup> channel                |
| <b>CLCN3</b>    | CIC3                      | chloride channel 3                                                        | NM_001829,X78520 | 4          | Hs00156527_m1 | 12           | Cl <sup>-</sup> channel                |
| <b>CLCN6</b>    | CIC6                      | chloride channel 6                                                        | NM_001286,NM_02  | 1          | Hs00154518_m1 | 4            | Cl <sup>-</sup> channel                |
| <b>CLCN7</b>    | CIC7                      | chloride channel 7                                                        | NM_001287,Z67743 | 16         | Hs00241850_m1 | 1            | Cl <sup>-</sup> channel                |
| <b>G6PD</b>     | G6PD                      | glucose-6-phosphate dehydrogenase                                         | NM_000402,M21248 | X          | Hs00166169_m1 | 2            | endogenous control                     |
| <b>GJA1</b>     | Cx43                      | gap junction protein, alpha 1, 43kDa (connexin 43)                        | NM_000165,M65188 | 6          | Hs00748445_s1 | 10           | Connexin                               |
| <b>GJA5</b>     | Cx40                      | gap junction protein, alpha 5, 40kDa (connexin 40)                        | NM_181703,NM_00  | 1          | Hs00270952_s1 | 1            | Connexin                               |
| <b>GJA7</b>     | Cx45                      | gap junction protein, alpha 7, 45kDa (connexin 45)                        | NM_005497,AK1243 | 17         | Hs00271416_s1 | 8            | Connexin                               |
| <b>HCN1</b>     | HCN1                      | hyperpolarization activated cyclic nucleotide-gated potassium channel 1   | NM_021072,AF0648 | 5          | Hs00395037_m1 | 1            | Cation channel                         |
| <b>HCN2</b>     | HCN2                      | hyperpolarization activated cyclic nucleotide-gated potassium channel 2   | NM_001194,AJ0125 | 19         | Hs00606903_m1 | 2            | Cation channel                         |
| <b>HCN3</b>     | HCN3                      | hyperpolarization activated cyclic nucleotide-gated potassium channel 3   | NM_020897,AB0409 | 1          | Hs00380018_m1 | 3            | Cation channel                         |
| <b>HCN4</b>     | HCN4                      | hyperpolarization activated cyclic nucleotide-gated potassium channel 4   | NM_005477,AJ1324 | 15         | Hs00175760_m1 | 1            | Cation channel                         |
| <b>HPRT1</b>    | HPRT                      | hypoxanthine phosphoribosyltransferase 1 (Lesch-Nyhan syndrome)           | NM_000194,M31642 | X          | Hs99999909_m1 | N/A          | endogenous control                     |
| <b>ISYNA1</b>   | ISYNA1                    | myo-inositol 1-phosphate synthase A1                                      | NM_016368,AF2205 | 19         | Hs00375021_g1 | 5            | endogenous control                     |

|               |        |                                                                          |                     |    |               |     |                            |
|---------------|--------|--------------------------------------------------------------------------|---------------------|----|---------------|-----|----------------------------|
| <b>ITPR1</b>  | IP3R1  | inositol 1,4,5-triphosphate receptor, type 1                             | NM_002222,D26070    | 3  | Hs00181881_m1 | 3   | Ca <sup>++</sup> regulator |
| <b>ITPR3</b>  | IP3R3  | inositol 1,4,5-triphosphate receptor, type 3                             | NM_002224,D26351    | 6  | Hs00609908_m1 | 1   | Ca <sup>++</sup> regulator |
| <b>KCNA1</b>  | Kv1.1  | potassium voltage-gated channel, shaker-related subfamily, member 1      | NM_000217,L02750    | 12 | Hs00264798_s1 | 8   | K <sup>+</sup> channel     |
| <b>KCNA2</b>  | Kv1.2  | potassium voltage-gated channel, shaker-related subfamily, member 2      | NM_004974,L02752    | 1  | Hs00270656_s1 | 8   | K <sup>+</sup> channel     |
| <b>KCNA3</b>  | Kv1.3  | potassium voltage-gated channel, shaker-related subfamily, member 3      | NM_002232,M85217    | 1  | Hs00704943_s1 | 22  | K <sup>+</sup> channel     |
| <b>KCNA4</b>  | Kv1.4  | potassium voltage-gated channel, shaker-related subfamily, member 4      | NM_002233,M55514    | 11 | Hs00357903_s1 | 1   | K <sup>+</sup> channel     |
| <b>KCNA5</b>  | Kv1.5  | potassium voltage-gated channel, shaker-related subfamily, member 5      | NM_002234,M83254    | 12 | Hs00266898_s1 | 7   | K <sup>+</sup> channel     |
| <b>KCNA6</b>  | Kv1.6  | potassium voltage-gated channel, shaker-related subfamily, member 6      | NM_002235,X17622    | 12 | Hs00266903_s1 | 4   | K <sup>+</sup> channel     |
| <b>KCNA7</b>  | Kv1.7  | potassium voltage-gated channel, shaker-related subfamily, member 7      | NM_031886,AF3158    | 19 | Hs00361015_m1 | 1   | K <sup>+</sup> channel     |
| <b>KCNAB1</b> | Kvβ1   | potassium voltage-gated channel, shaker-related subfamily, beta member 1 | NM_172159,NM_172130 | 3  | Hs00185764_m1 | 4   | K <sup>+</sup> channel     |
| <b>KCNAB2</b> | Kvβ2   | potassium voltage-gated channel, shaker-related subfamily, beta member 2 | NM_172130,NM_004732 | 1  | Hs00186308_m1 | 4   | K <sup>+</sup> channel     |
| <b>KCNAB3</b> | Kvβ3   | potassium voltage-gated channel, shaker-related subfamily, beta member 3 | NM_004732,AF0164    | 17 | Hs00190986_m1 | 6   | K <sup>+</sup> channel     |
| <b>KCNB1</b>  | Kv2.1  | potassium voltage-gated channel, Shab-related subfamily, member 1        | NM_004975,L02840    | 20 | Hs00270657_m1 | 1   | K <sup>+</sup> channel     |
| <b>KCNB2</b>  | Kv2.2  | potassium voltage-gated channel, Shab-related subfamily, member 2        | NM_004770,NM_004976 | 8  | Hs00191116_m1 | 1   | K <sup>+</sup> channel     |
| <b>KCNC1</b>  | Kv3.1  | potassium voltage-gated channel, Shaw-related subfamily, member 1        | NM_004976,NM_004977 | 11 | Hs00428197_m1 | 1   | K <sup>+</sup> channel     |
| <b>KCNC2</b>  | Kv3.2  | potassium voltage-gated channel, Shaw-related subfamily, member 2        | NM_139137,NM_139138 | 12 | Hs00373568_m1 | 3   | K <sup>+</sup> channel     |
| <b>KCNC3</b>  | Kv3.3  | potassium voltage-gated channel, Shaw-related subfamily, member 3        | NM_004977,AF0559    | 19 | Hs00192108_m1 | 7   | K <sup>+</sup> channel     |
| <b>KCNC4</b>  | Kv3.4  | potassium voltage-gated channel, Shaw-related subfamily, member 4        | NM_153763,NM_004979 | 1  | Hs00428198_m1 | 1   | K <sup>+</sup> channel     |
| <b>KCND1</b>  | Kv4.1  | potassium voltage-gated channel, Shal-related subfamily, member 1        | NM_004979,AJ0058    | X  | Hs00192113_m1 | 5   | K <sup>+</sup> channel     |
| <b>KCND2</b>  | Kv4.2  | potassium voltage-gated channel, Shal-related subfamily, member 2        | NM_012281,AB0289    | 7  | Hs00273378_m1 | 4   | K <sup>+</sup> channel     |
| <b>KCND3</b>  | Kv4.3  | potassium voltage-gated channel, Shal-related subfamily, member 3        | NM_004980,NM_004981 | 1  | Hs00270661_m1 | 5   | K <sup>+</sup> channel     |
| <b>KCNE1</b>  | MinK   | potassium voltage-gated channel, Isk-related family, member 1            | NM_000219,L28168    | 21 | Hs00264799_s1 | 1   | K <sup>+</sup> channel     |
| <b>KCNE1L</b> | MIRP4  | KCNE1-like                                                               | NM_012282,AJ0127    | X  | Hs00273381_s1 | 2   | K <sup>+</sup> channel     |
| <b>KCNE2</b>  | MIRP1  | potassium voltage-gated channel, Isk-related family, member 2            | NM_172201,AF0710    | 21 | Hs00270822_s1 | 1   | K <sup>+</sup> channel     |
| <b>KCNE3</b>  | MIRP2  | potassium voltage-gated channel, Isk-related family, member 3            | NM_005472,BC0322    | 11 | Hs00538801_m1 | 1   | K <sup>+</sup> channel     |
| <b>KCNE4</b>  | MIRP3  | potassium voltage-gated channel, Isk-related family, member 4            | NM_080671,BC0144    | 2  | Hs00758199_g1 | 1   | K <sup>+</sup> channel     |
| <b>KCNH2</b>  | Herg   | potassium voltage-gated channel, subfamily H (eag-related), member 2     | NM_172056,NM_001731 | 7  | Hs00165120_m1 | 3   | K <sup>+</sup> channel     |
| <b>KCNIP2</b> | KChIP2 | Kv channel interacting protein 2                                         | NM_173191,NM_173192 | 10 | Hs00601709_g1 | 8   | K <sup>+</sup> channel     |
| <b>KCNJ1</b>  | Kir1.1 | potassium inwardly-rectifying channel, subfamily J, member 1             | NM_000220,NM_000221 | 11 | Hs00165012_m1 | 1   | K <sup>+</sup> channel     |
| <b>KCNJ11</b> | Kir6.2 | potassium inwardly-rectifying channel, subfamily J, member 11            | NM_000525,BC0644    | 11 | Hs00265026_s1 | 6   | K <sup>+</sup> channel     |
| <b>KCNJ12</b> | Kir2.2 | potassium inwardly-rectifying channel, subfamily J, member 12            | NM_021012,L36069    | 17 | Hs00266926_s1 | N/A | K <sup>+</sup> channel     |
| <b>KCNJ2</b>  | Kir2.1 | potassium inwardly-rectifying channel, subfamily J, member 2             | NM_000891,U12507    | 17 | Hs00265315_m1 | 1   | K <sup>+</sup> channel     |
| <b>KCNJ3</b>  | Kir3.1 | potassium inwardly-rectifying channel, subfamily J, member 3             | NM_002239,U50964    | 2  | Hs00158421_m1 | 1   | K <sup>+</sup> channel     |
| <b>KCNJ4</b>  | Kir2.3 | potassium inwardly-rectifying channel, subfamily J, member 4             | NM_152868,NM_000089 | 22 | Hs00705379_s1 | 18  | K <sup>+</sup> channel     |
| <b>KCNJ5</b>  | Kir3.4 | potassium inwardly-rectifying channel, subfamily J, member 5             | NM_000890,D50134    | 11 | Hs00168476_m1 | 2   | K <sup>+</sup> channel     |
| <b>KCNJ8</b>  | Kir6.1 | potassium inwardly-rectifying channel, subfamily J, member 8             | NM_004982,D50312    | 12 | Hs00270663_m1 | 1   | K <sup>+</sup> channel     |
| <b>KCNK1</b>  | TWIK1  | potassium channel, subfamily K, member 1                                 | NM_002245,U33632    | 1  | Hs00158428_m1 | 2   | K <sup>+</sup> channel     |
| <b>KCNK3</b>  | TASK1  | potassium channel, subfamily K, member 3                                 | NM_002246,AF0068    | 2  | Hs00605529_m1 | 1   | K <sup>+</sup> channel     |
| <b>KCNK5</b>  | TASK2  | potassium channel, subfamily K, member 5                                 | NM_003740,AF0848    | 6  | Hs00186652_m1 | 1   | K <sup>+</sup> channel     |
| <b>KCNQ1</b>  | KvLQT1 | potassium voltage-gated channel, KQT-like subfamily, member 1            | NM_181797,NM_181798 | 11 | Hs00165003_m1 | 15  | K <sup>+</sup> channel     |
| <b>MYH7</b>   | β-MHC  | myosin, heavy polypeptide 7, cardiac muscle, beta                        | NM_000257,M58018    | 14 | Hs00165276_m1 | 26  | Cytoskeletal protein       |

|               |         |                                                                       |                  |    |               |    |                            |
|---------------|---------|-----------------------------------------------------------------------|------------------|----|---------------|----|----------------------------|
| <b>NPPA</b>   | ANP     | natriuretic peptide precursor A                                       | NM_006172,M30262 | 1  | Hs00383230_g1 | 1  | Signaling molecule         |
| <b>NPPB</b>   | BNP     | natriuretic peptide precursor B                                       | NM_002521,M25296 | 1  | Hs00173590_m1 | 2  | Signaling molecule         |
| <b>PIAS3</b>  | KChAP   | protein inhibitor of activated STAT, 3                                | NM_006099,AB0218 | 1  | Hs00180666_m1 | 7  | K <sup>+</sup> channel     |
| <b>PLN</b>    | PLB     | phospholamban                                                         | NM_002667,M63603 | 6  | Hs00160179_m1 | 1  | Ca <sup>++</sup> regulator |
| <b>PPP3CA</b> | CAM-PRP | protein phosphatase 3 (formerly 2B), catalytic subunit, alpha isoform | NM_000944,L14778 | 4  | Hs00174223_m1 | 10 | Ca <sup>++</sup> regulator |
| <b>RYR2</b>   | RYR2    | ryanodine receptor 2 (cardiac)                                        | NM_001035,X98330 | 1  | Hs00181461_m1 | 10 | Ca <sup>++</sup> regulator |
| <b>SCN1A</b>  | Nav1.1  | sodium channel, voltage-gated, type I, alpha                          | NM_006920,AF2259 | 2  | Hs00374696_m1 | 17 | Na <sup>+</sup> channel    |
| <b>SCN1B</b>  | Navβ1   | sodium channel, voltage-gated, type I, beta                           | NM_001037,L10338 | 19 | Hs00168897_m1 | 2  | Na <sup>+</sup> channel    |
| <b>SCN2B</b>  | Navβ2   | sodium channel, voltage-gated, type II, beta                          | NM_004588,AF0077 | 11 | Hs00394952_m1 | 3  | Na <sup>+</sup> channel    |
| <b>SCN3A</b>  | Nav1.3  | sodium channel, voltage-gated, type III, alpha                        | NM_006922,AF0356 | 2  | Hs00366902_m1 | 12 | Na <sup>+</sup> channel    |
| <b>SCN3B</b>  | Navβ3   | sodium channel, voltage-gated, type III, beta                         | NM_018400,AB0329 | 11 | Hs00393218_m1 | 4  | Na <sup>+</sup> channel    |
| <b>SCN4A</b>  | Nav1.4  | sodium channel, voltage-gated, type IV, alpha                         | NM_000334,M81758 | 17 | Hs00165686_m1 | 5  | Na <sup>+</sup> channel    |
| <b>SCN5A</b>  | Nav1.5  | sodium channel, voltage-gated, type V, alpha (long QT syndrome 3)     | NM_198056,NM_00  | 3  | Hs00165693_m1 | 11 | Na <sup>+</sup> channel    |
| <b>SCN7A</b>  | Nav2.1  | sodium channel, voltage-gated, type VII, alpha                        | NM_002976,M91556 | 2  | Hs00161546_m1 | 10 | Na <sup>+</sup> channel    |
| <b>SCN9A</b>  | Nav1.7  | sodium channel, voltage-gated, type IX, alpha                         | NM_002977,X82835 | 2  | Hs00161567_m1 | 11 | Na <sup>+</sup> channel    |
| <b>SLC8A1</b> | NCX1    | solute carrier family 8 (sodium/calcium exchanger), member 1          | NM_021097,M91368 | 2  | Hs00253432_m1 | 2  | Ca <sup>++</sup> regulator |

#### Assay-on-demand

|               |                   |                                                                   |                  |    |               |    |                            |
|---------------|-------------------|-------------------------------------------------------------------|------------------|----|---------------|----|----------------------------|
| <b>CD4</b>    | CD4 antigen       | CD4 antigen (p55)                                                 | NM_000616,M12807 | 12 | Hs00181217_m1 | 2  | marker of inflammation     |
| <b>CNN1</b>   | Calponin 1        | calponin 1, basic, smooth muscle                                  | NM_001299,D17408 | 19 | Hs00154543_m1 | 1  | marker of vascular vessels |
| <b>COL6A1</b> | Procollagen 6, α1 | collagen, type VI, alpha 1                                        | NM_001848,M27447 | 21 | Hs00242448_m1 | 20 | marker of fibroblasts      |
| <b>IL6</b>    | Il6               | interleukin 6 (interferon, beta 2)                                | NM_000600,X04403 | 7  | Hs00174131_m1 | 3  | marker of inflammation     |
| <b>UCHL1</b>  | UCHL1             | ubiquitin carboxyl-terminal esterase L1 (ubiquitin thiolesterase) | NM_004181,X04741 | 4  | Hs00188233_m1 | 8  | marker of neuronal tissue  |
